# Supplementary material
Source: publisher figshare collection journal article supplement (https://acs.figshare.com/ndownloader/files/4484158)
Supplement: Supplementary file 1 [file 4484158]

# Inactivation of *Lactobacillus leichamannii* ribonucleotide reductase by F<sub>2</sub>CTP: covalent modification

Gregory J. S. Lohman,<sup>‡</sup> and JoAnne Stubbe.<sup>\*,‡,†</sup>

Departments of Chemistry and Biology, Massachusetts Institute of Technology, Cambridge, MA

02139

\* To whom correspondence should be addressed. Tel: (617) 253-1814. Fax: (617) 258-7247.

E-mail: stubbe@mit.edu

**RECEIVED DATE (to be automatically inserted after your manuscript is accepted if  
required according to the journal that you are submitting your paper to)**

<sup>‡</sup>Department of Chemistry, Massachusetts Institute of Technology.

<sup>†</sup>Department of Biology, Massachusetts Institute of Technology.

**SUPPORTING INFORMATION**

SCHEME S1: Synthesis of F<sub>2</sub>C.

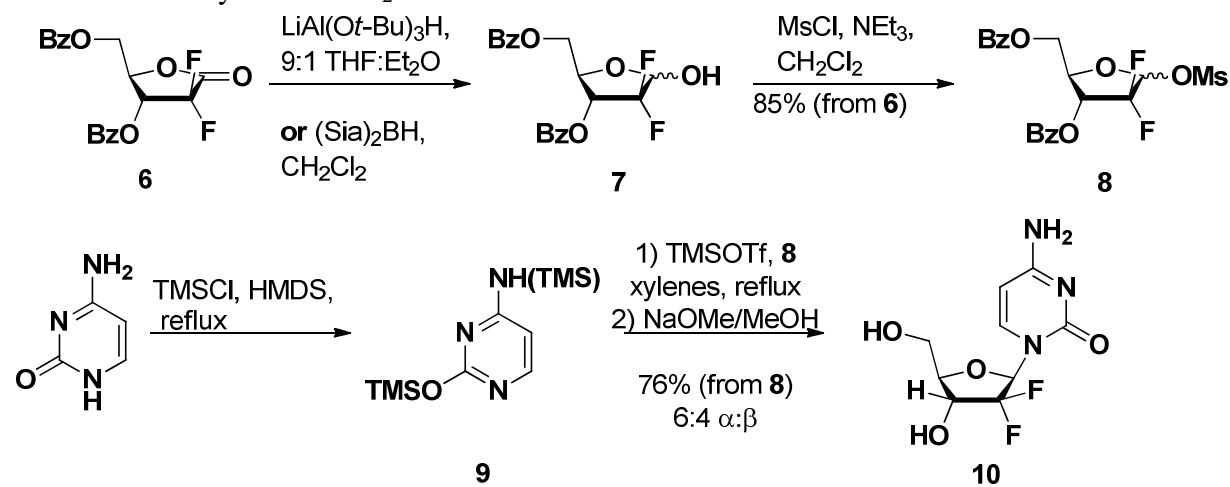

SCHEME S2: PSD fragmentation along the peptide-bonds to give b type and y type ions.

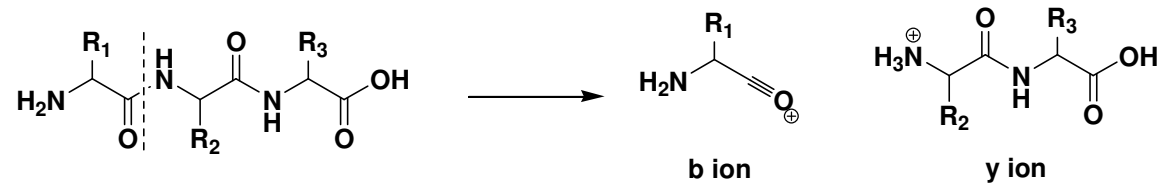

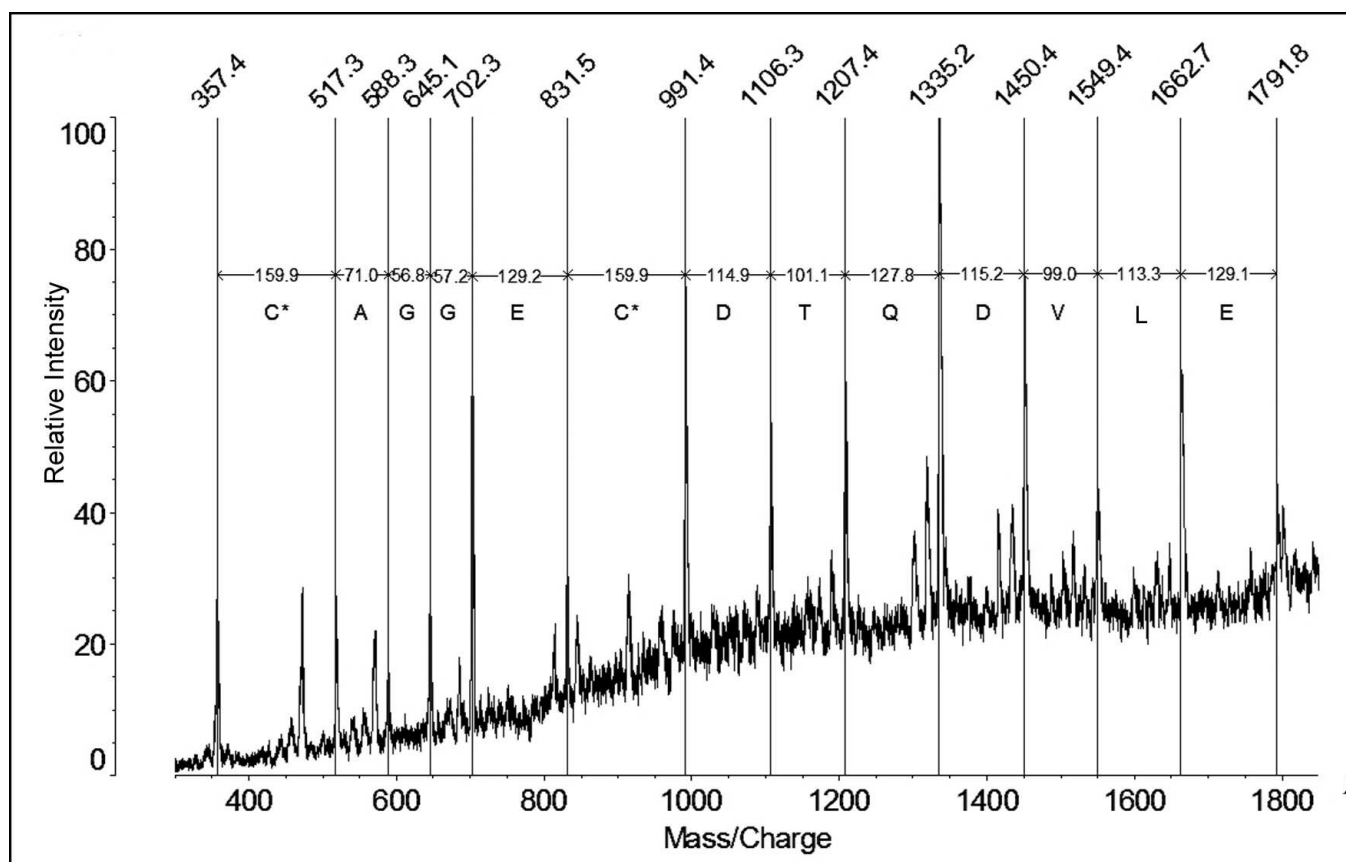

FIGURE S1: Annotated MS/MS spectrum of the 2020 Da peptide corresponding to the diacetamide labeled C-terminal RTPR peptide (DLELVDQTDCEGGACPIK). The y ion series is highlighted, representing fragmentation along the peptide bond with charge retention on the N-terminus. The difference in mass between each ion is the mass of the amino acid cleaved. C\* = acetamide modified cysteine.
